# Supplementary material for: A porous reduced graphene oxide/chitosan-based nanocarrier as a delivery system of doxorubicin
Source: Royal Society of Chemistry journal article supplement (doi:10.1039/c9ra04977k), 2019-01-01
Supplement: c9ra04977k1.pdf [file c9ra04977k1.pdf]

## SUPPLEMENTARY INFORMATION

### Porous reduced graphene oxide/chitosan-based nanocarrier for delivery system of doxorubicin

N. Hazhir<sup>a</sup>, F. Chekin<sup>\*a</sup>, J. B. Raof<sup>b</sup> and Sh. Fathi<sup>a</sup>

<sup>a</sup>Department of Chemistry, Ayatollah Amoli Branch, Islamic Azad University, Amol, Iran

<sup>b</sup>Electroanalytical Chemistry Research Laboratory, Department of Analytical Chemistry,

Faculty of Chemistry, University of Mazandaran, Babolsar, Iran

\*Corresponding author. Tel: +98-121-2517087; Fax: +98-121-2517087; E-mail: [fchekin@yahoo.com](mailto:fchekin@yahoo.com)

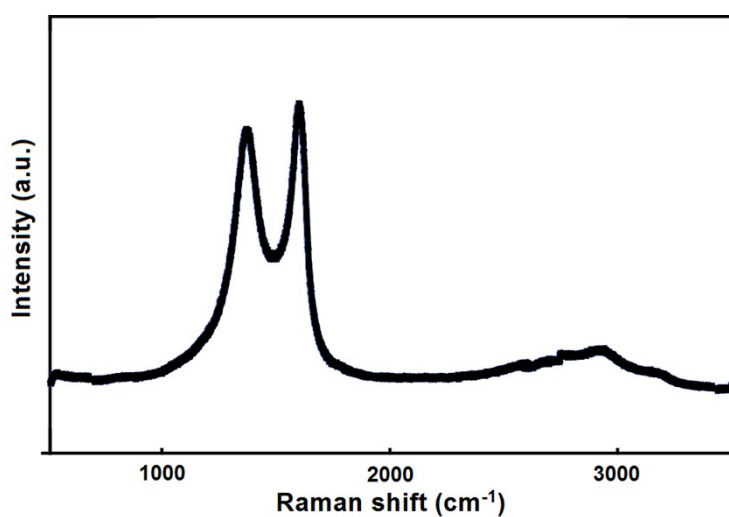

Fig. S1: The Raman spectrum of prGO.

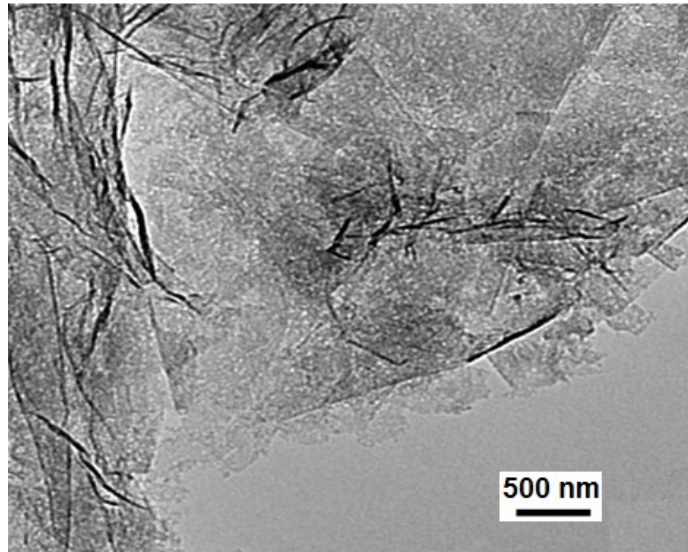

Fig. S2: TEM image of prGO.
